# Supplementary material
Source: Springer Nature journal article supplement (https://www.springermedizin.de/resource/supplementary/12913_2011_1575_MOESM2_ESM.pdf/9529320)
Supplement: MOESM2 [file 9529320]

# RANDOM assignment of patients to CG or IG

- Invite patients and families to participate in the study
- Request the collaboration of health care professionals

N = 30 patients  
**GI**

N = 30 patients  
**GC**

**SOFTWARE INSTALLATION,  
DEPLOYMENT OF DEVICES and TRAINING**  
of health care professionals, patients and family members  
by the supplier and the research team

## PREPARATION AND TRAINING 4-hr WORKSHOP

- Management of COPD and HF and decompensation episodes
- Explanation of the project aims
- Utilisation of telemonitoring devices and Web-based platform (IG)

## CLINICAL MANAGEMENT by DOCTORS (GP) & NURSES (N)

- Daily check of the data received (GP,N)
- Telephone call every two weeks (N)
- Feedback by telephone (N, GP)
- Action in the event of decompensation (GP, N)

**CLINICAL MANAGEMENT  
by DOCTORS & NURSES**  
Usual care

## FIRST VISIT, INITIAL ASSESSMENT & DATA COLLECTION

*Research Team*

- Informed consent
- Socio-demographic and clinical data (baseline)

## PERIODIC VISITS (at 3, 6 and 12 months) for ASSESSMENT AND DATA COLLECTION

*Research Team*
